# Supplementary material for: Targeting CD96 overcomes PD-1 blockade resistance by enhancing CD8+ TIL function in cervical cancer
Source: HighWire-hosted journal article supplement (doi:10.1136/jitc-2021-003667), 2022-03-01
Supplement: jitc-2021-003667supp001_data_supplement.xlsx [file jitc-2021-003667supp001_data_supplement.xlsx]

## Sheet: Sheet1
Supplementary Table 1. The characteristics of each patient
Patient ID	IT	PT	Blood	Age	Clinical stage	Histological type	HPV infection
P1	1			63	IIA2	SCCA	N/A
P2	1			52	IIA2	SCC	yes
P3	1			52	IB3	SCC	no
P4	1			28	IIA2	SCC	no
P5	1			48	IIA2	SCC	N/A
P6	1			33	IIIC1	ACB	no
P7	1			67	IIA2	AC	yes
P8	1			48	IIIC	AC	no
P9	1			67	IIA2	SCC	N/A
P10	1			48	IIA2	SCC	N/A
P11	1			58	IIA2	SCC	N/A
P12	1			47	IIB	SCC	yes
P13	1			57	IIIC1	SCC	yes
P14	1			55	IIIC1	SCC	yes
P15	1			66	IIIC1	SCC	N/A
P16	1			47	IB2	SCC	yes
P17	1	1	1	50	IB2	SCC	yes
P18	1	1		52	IIIC1	SCC	yes
P19	1		1	53	IB2	SCC	yes
P20	1			57	IB2	SCC	yes
P21	1	1	1	50	IIIC1	SCC	yes
P22	1			60	IIIC1	SCC	yes
P23	1	1	1	36	IB1	SCC	yes
P24	1			56	IB2	SCC	yes
P25	1	1	1	71	IIA2	SCC	yes
P26	1			44	IB2	ASCC	N/A
P27	1			45	IIIC1	ASC	yes
P28	1			54	IIA2	SCC	yes
P29	1			51	IIA2	SCC	yes
P30	1	1	1	31	IB1	SCC	yes
P31	1	1	1	49	IIIC2	AC	no
P32	1	1	1	71	IIIC1	SCC	yes
P33	1	1	1	61	IB1	SCC	yes
P34	1	1	1	36	IB3	SCC	N/A
P35	1	1	1	62	IIA2	SCC	yes
P36	1	1	1	38	IIIC1	SCC	yes
P37	1	1	1	43	IIIC1	AC	no
P38	1	1	1	54	IIA1	SCC	yes
P39	1	1	1	51	IB3	SCC	yes
P40	1	1	1	52	IB3	SCC	yes
P41	1	1	1	57	IIA1	SCC	N/A
P42	1	1	1	42	IB2	SCC	yes
P43	1			58	IB2	SCNECd	yes
Asquamous cell carcinoma, Badenocacinoma, Cadenosquamous cacinoma, dsmall cell neuroendocrine carcinoma
