# Supplementary material for: Targeting CD96 overcomes PD-1 blockade resistance by enhancing CD8+ TIL function in cervical cancer
Source: HighWire-hosted journal article supplement (doi:10.1136/jitc-2021-003667), 2022-03-01
Supplement: jitc-2021-003667supp003_data_supplement.xlsx [file jitc-2021-003667supp003_data_supplement.xlsx]

## Sheet: Sheet1
Supplementary Table 2. Antibodies for flow cytometry analysis
Source	Identifier	Antibody	Clone
Biolegend	329511	human anti-2B4/CD244	C1.7
Biolegend	344505	human anti-BTLA4/CD272	MIH26
BD	563449	human anti-CCR7	3D12
Biolegend	328619	human anti-CD107a	H4A3
Biolegend	301805	human anti-CD14	M5E2
Biolegend	337631	human anti-CD155	SKII.4
Biolegend	341211	human anti-CD160	BY55
Biolegend	302329	human anti-CD20	2H7
Biolegend	338329	human anti-CD226	11A8
Biolegend	317335	human anti-CD3	OKT3
Biolegend	300305	human anti-CD3	HIT3a
Biolegend	303515	human anti-CD38	HIT2
Biolegend	328209	human anti-CD39	A1
BD	562970	human anti-CD4	SK3
Biolegend	304062	human anti-CD45	HI30
Biolegend	304125	human anti-CD45RA	HI100
Biolegend	362537	human anti-CD56	5.1H11
Biolegend	344003	human anti-CD73	AD2
Biolegend	344704	human anti-CD8	SK1
BD	562379	human anti-CD96	6F9
Biolegend	338405	human anti-CD96	NK92.39
Biolegend	369613	human anti-CTLA4	BNI3
ebioscience	50487741	human anti-eomes	WD1928
Biolegend	372219	human anti-granzymeB	QA16A02
Biolegend	307630	human anti-HLA-DR	L243
Biorbyt	orb186600-CF647	human anti-Hobit	NA
Biolegend	502541	human anti-IFNG	4S.B3
Biolegend	500327	human anti-IL-2	MQ1-17H12
Biolegend	350519	human anti-Ki67	Ki-67
Biolegend	369303	human anti-LAG3	11C3C65
Biolegend	348701	human anti-Lineage Cocktail (CD3, CD14, CD19, CD20, CD56)	UCHT1; HCD14; HIB19; 2H7; HCD56
Biolegend	329919	human anti-PD-1	EH12.2H7
Biolegend	367421	human anti-PD-1	NAT105
Biolegend	308125	human anti-perforin	dG9
Biolegend	308105	human anti-perforin	dG9
Biolegend	655207	human anti-TCF1	7F11A10
Biolegend	372705	human anti-TIGIT	A15153G
Biolegend	345005	human anti-TIM3	F38-2E2
Biolegend	502929	human anti-TNFα	MAb11
BD	566671	human anti-VISTA/PD-1H	MIH65.rMAb
Biolegend	121617	mouse anti-CD107a	1D4B
Biolegend	100219	mouse anti-CD3	17A2
Biolegend	100733	mouse anti-CD8a	53-6.7
Biolegend	162403	mouse anti-CD96	QA19A37
Biolegend	515403	mouse anti-granzymeB	GB11
Biolegend	505841	mouse anti-IFN-γ	XMG1.2
Biolegend	151211	mouse anti-Ki67	11F6
Biolegend	135221	mouse anti-PD-1(CD279)	29F.1A12
Biolegend	154305	mouse anti-perforin	S16009A
Biolegend	506307	mouse anti-TNF-α	MP6-XT22
