# Supplementary material for: Targeting CD96 overcomes PD-1 blockade resistance by enhancing CD8+ TIL function in cervical cancer
Source: PubMed Central journal article supplement — J Immunother Cancer. 2022 Mar 11;10(3):e003667. doi: 10.1136/jitc-2021-003667 (PMC8921917; doi:10.1136/jitc-2021-003667), 2022-03-11
Supplement: jitc-2021-003667supp014.pdf [file jitc-2021-003667supp014.pdf]

## Targeting CD96 overcomes PD-1 blockade resistance by enhancing terminal exhausted effector CD8+TIL function in cervical cancer

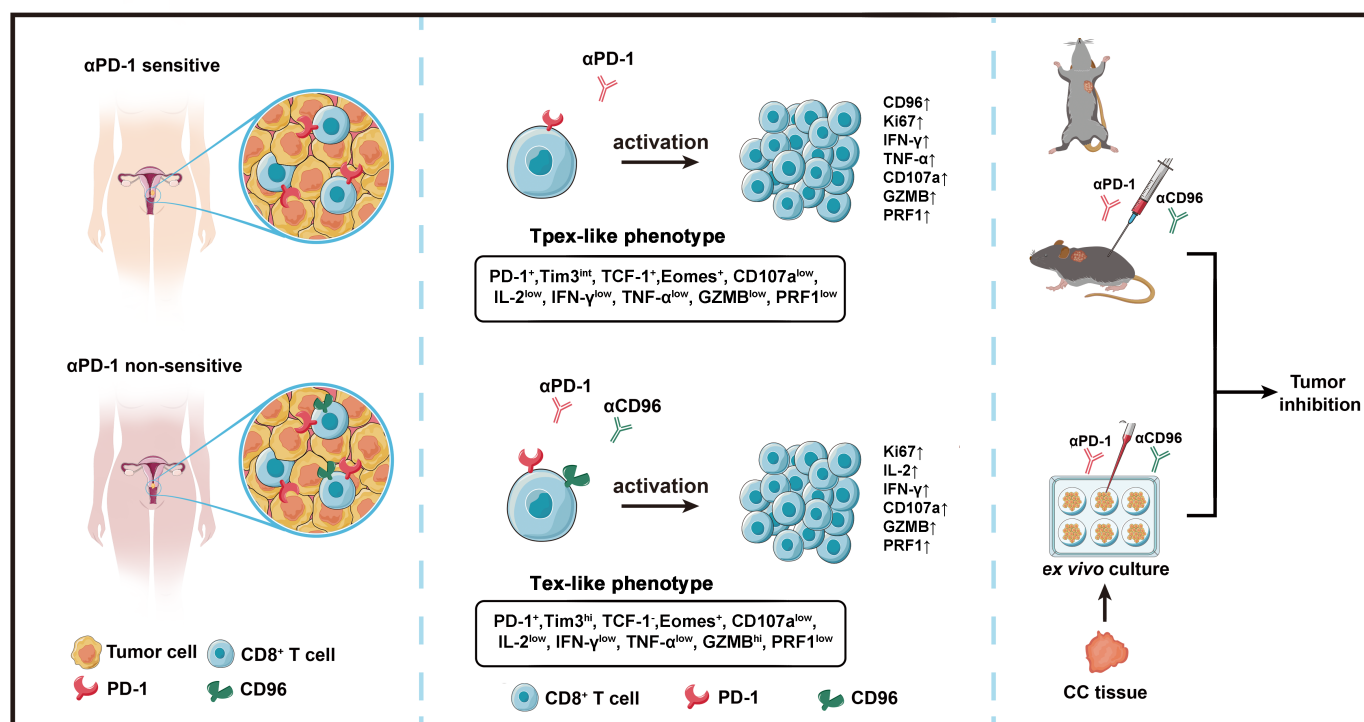

### Authors

Yu-meng, Wang; Cong-wen, Wang; Jun-jun, Qiu; Xin-yu Qu; Jing, Peng; Chong, Lu; Meng, Zhang; Ming-Xing, Zhang; Qing-Ling, Qi; Gui-ling, Li; Ke-qin, Hua

### Correspondence

guilingli@fudan.edu.cn; huakeqin@fudan.edu.cn

### In Brief

Elevated CD96 expression on CD8+ TILs is associated with PD-1 resistance

CD96 is coexpressed with PD-1, and this expression pattern defines the precursor or terminal exhausted phenotype of CD8+ TILs

Targeting CD96 with blockade enhanced PD-1 blockade treatment by increasing CD8+TIL function in preclinical models
