# Supplementary figures and images for: Targeting CD96 overcomes PD-1 blockade resistance by enhancing CD8+ TIL function in cervical cancer
Source: PubMed Central journal article supplement — J Immunother Cancer. 2022 Mar 11;10(3):e003667. doi: 10.1136/jitc-2021-003667 (PMC8921917; doi:10.1136/jitc-2021-003667), 2022-03-11

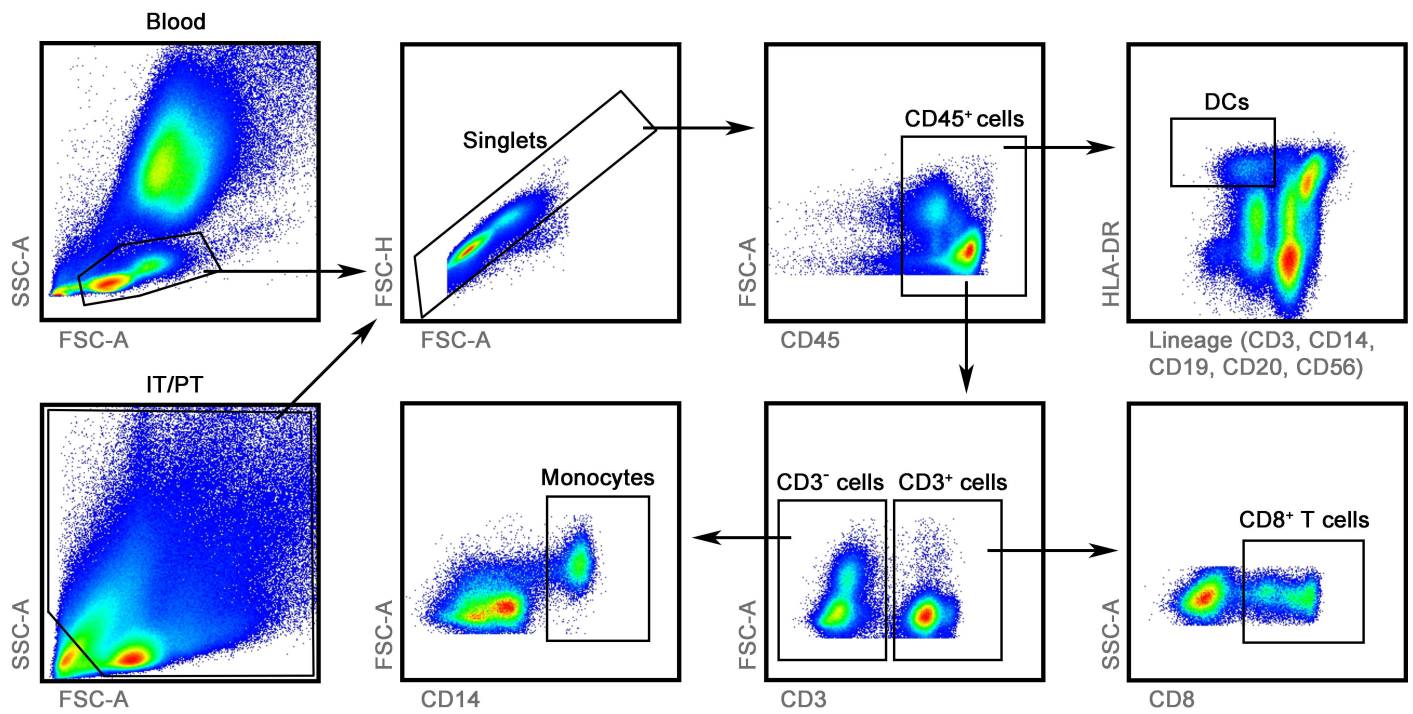

Supplement: jitc-2021-003667supp005.pdf [file jitc-2021-003667supp005.pdf]

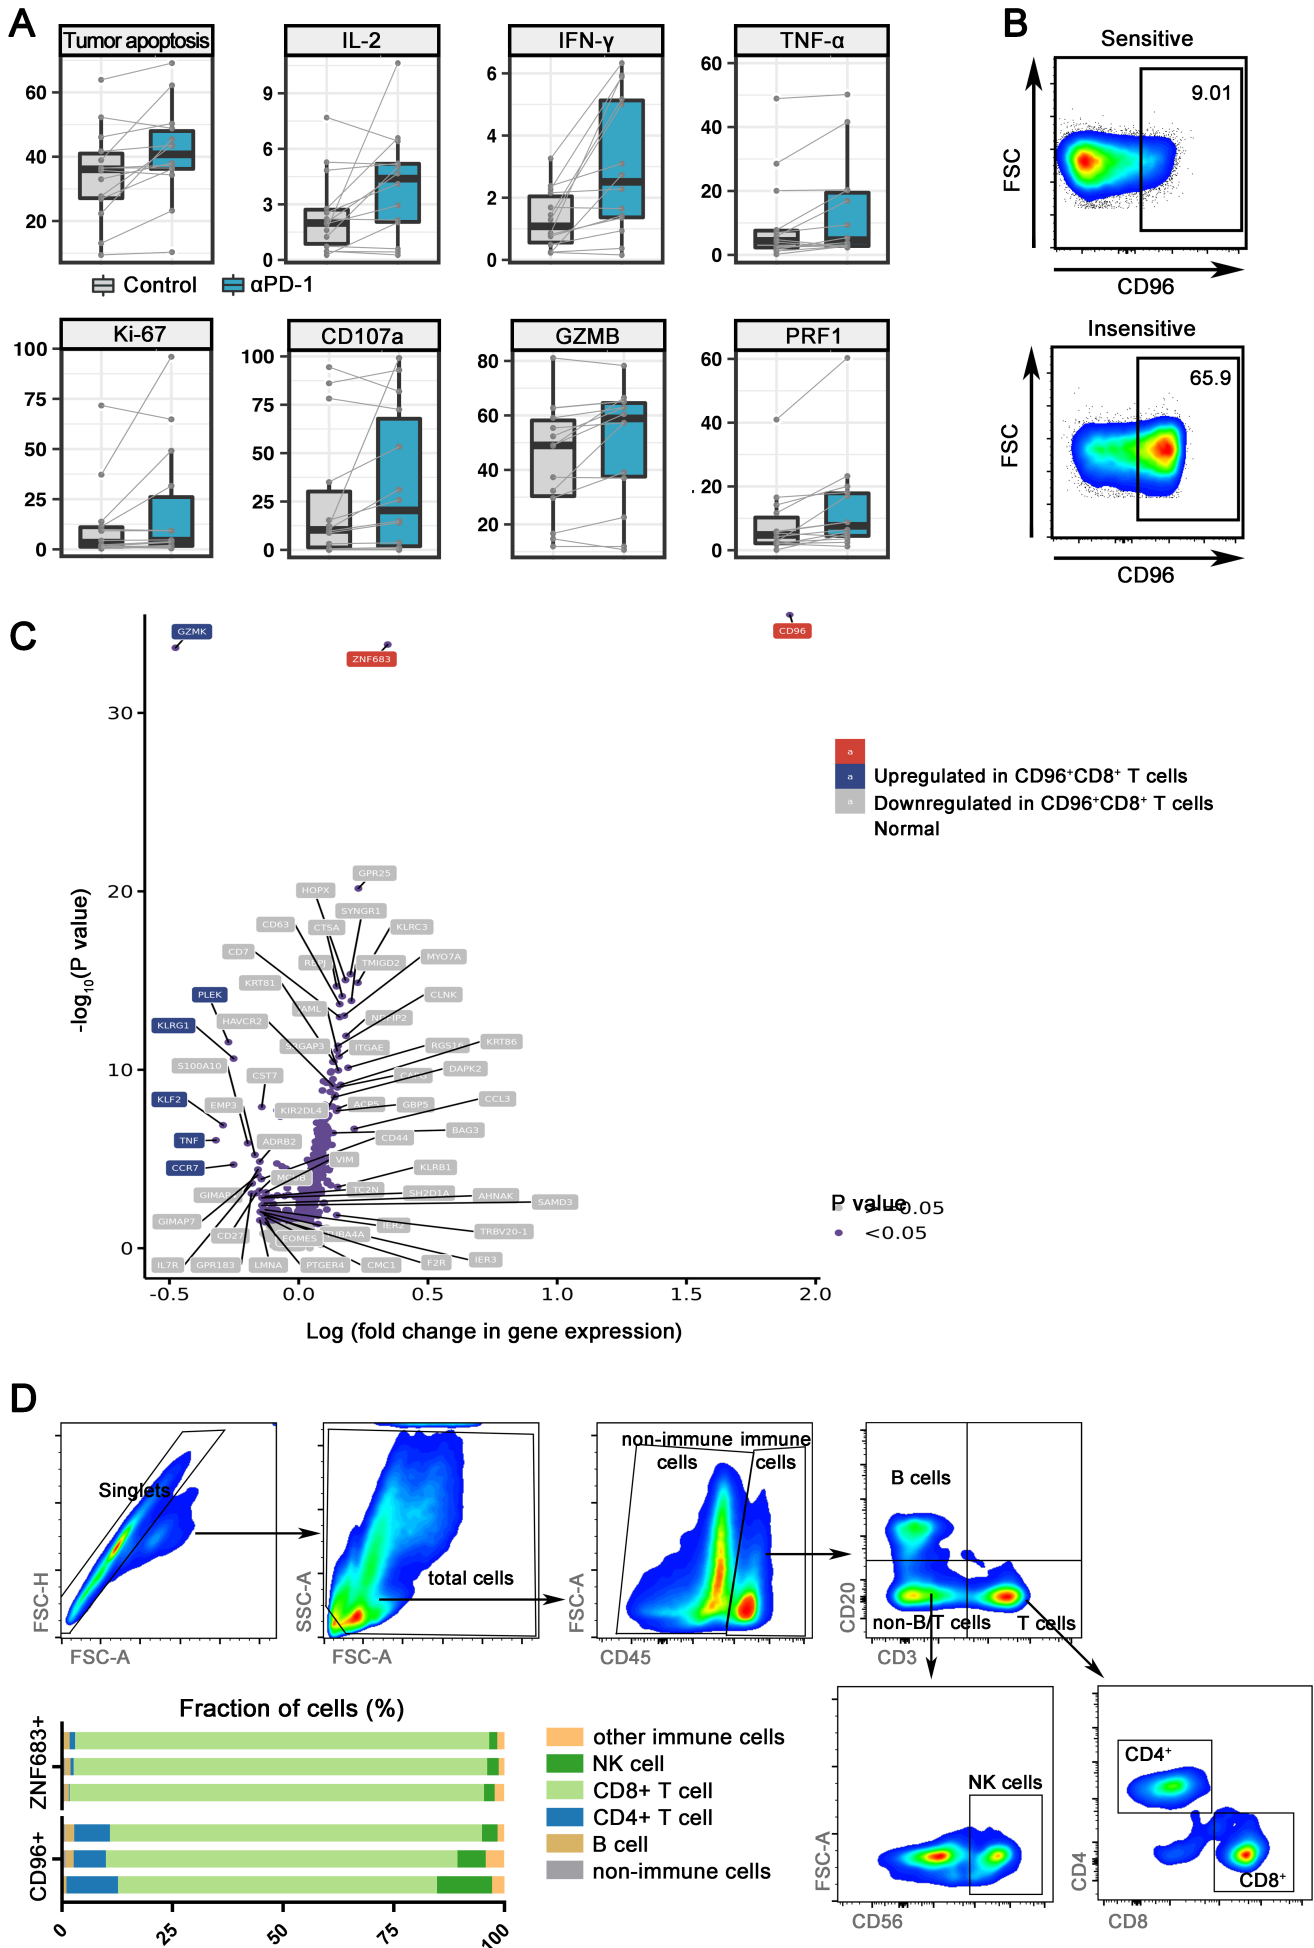

Supplement: jitc-2021-003667supp007.pdf [file jitc-2021-003667supp007.pdf]

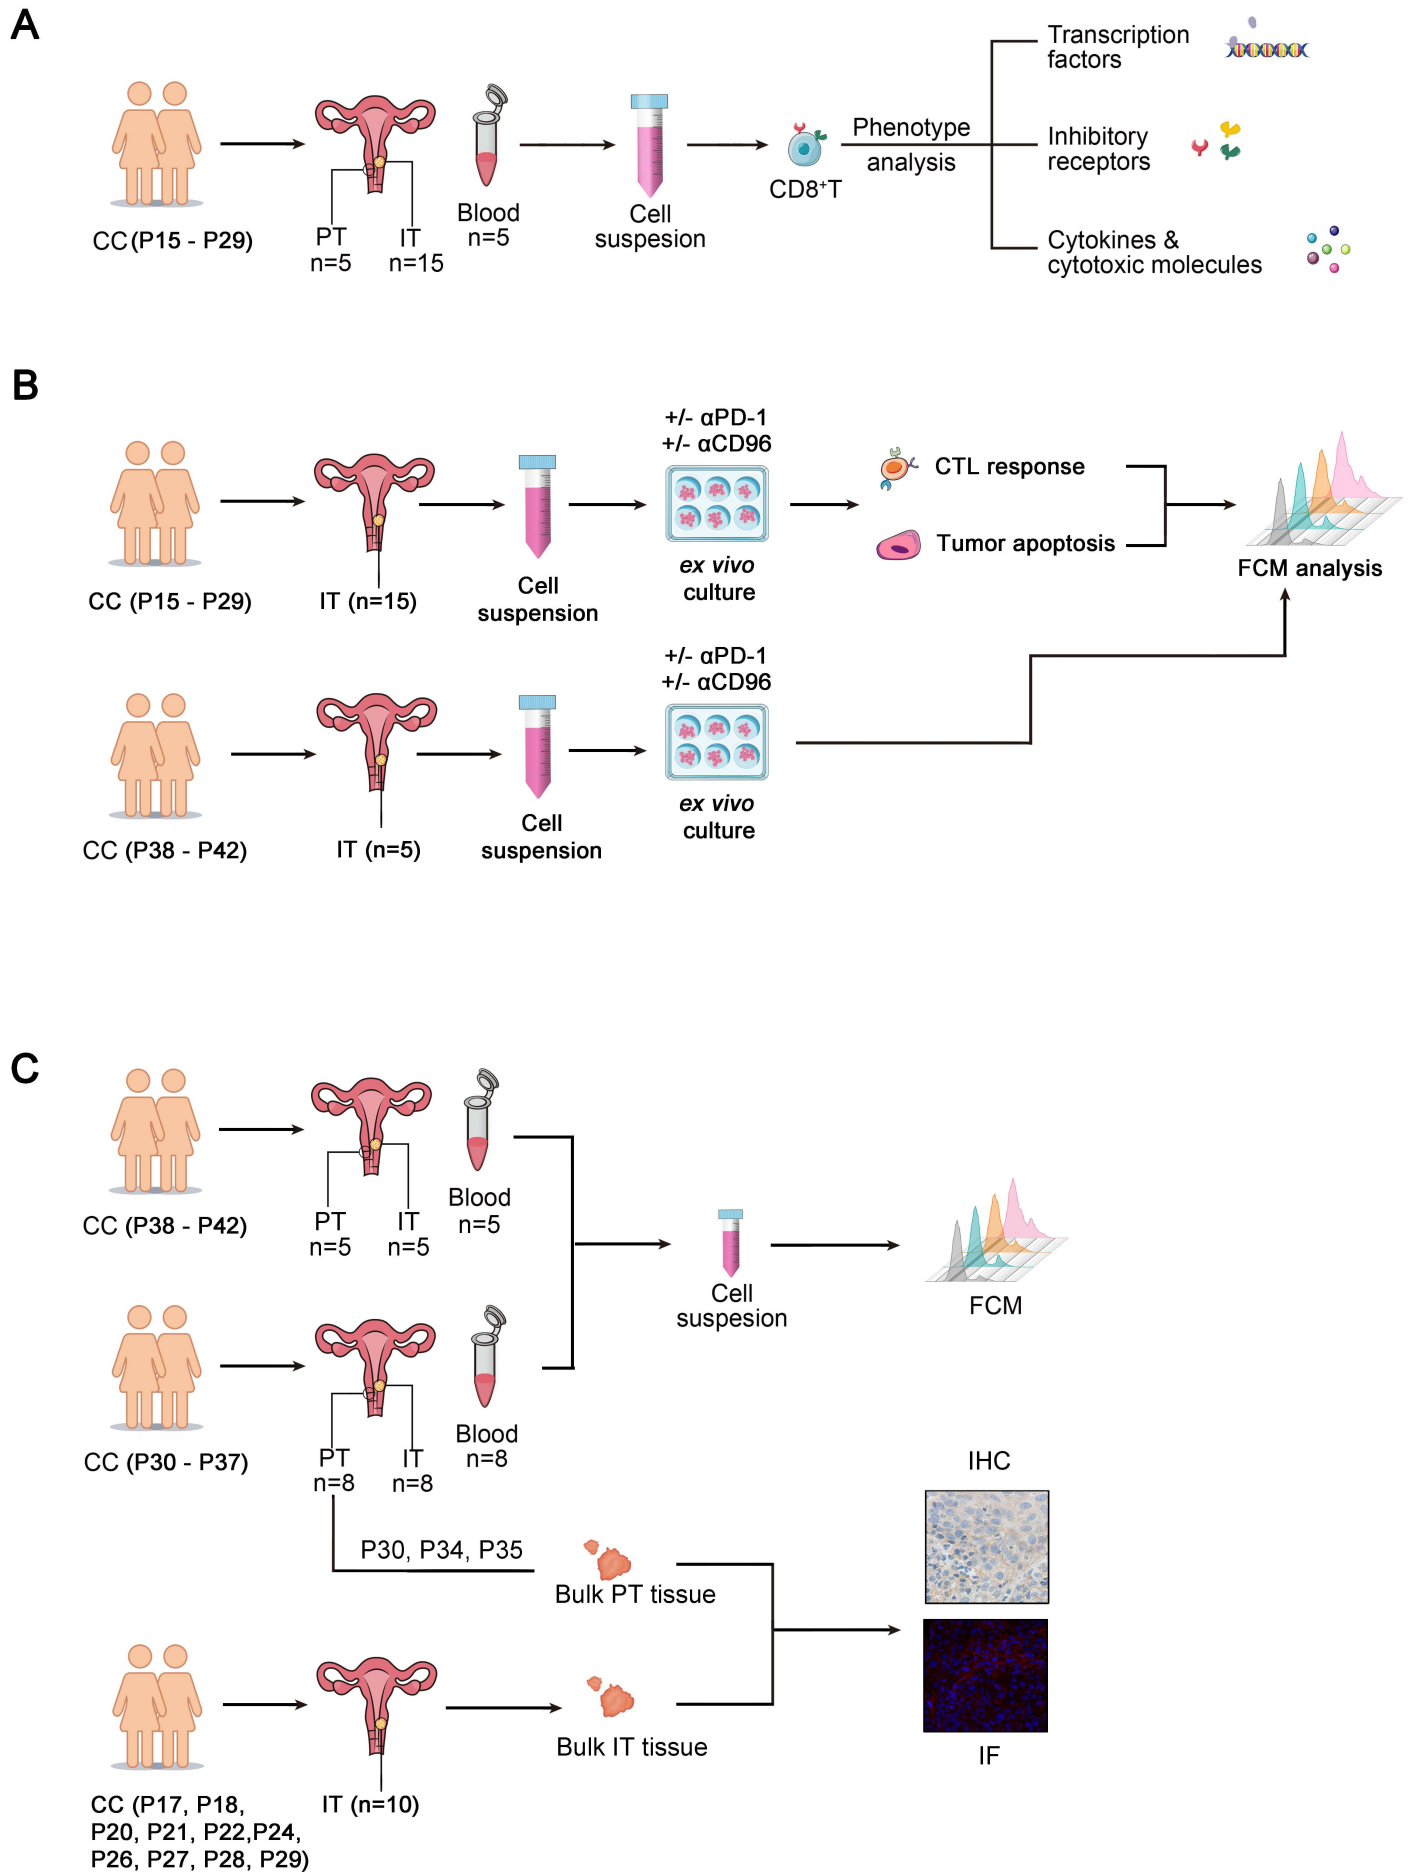

Supplement: jitc-2021-003667supp008.pdf [file jitc-2021-003667supp008.pdf]

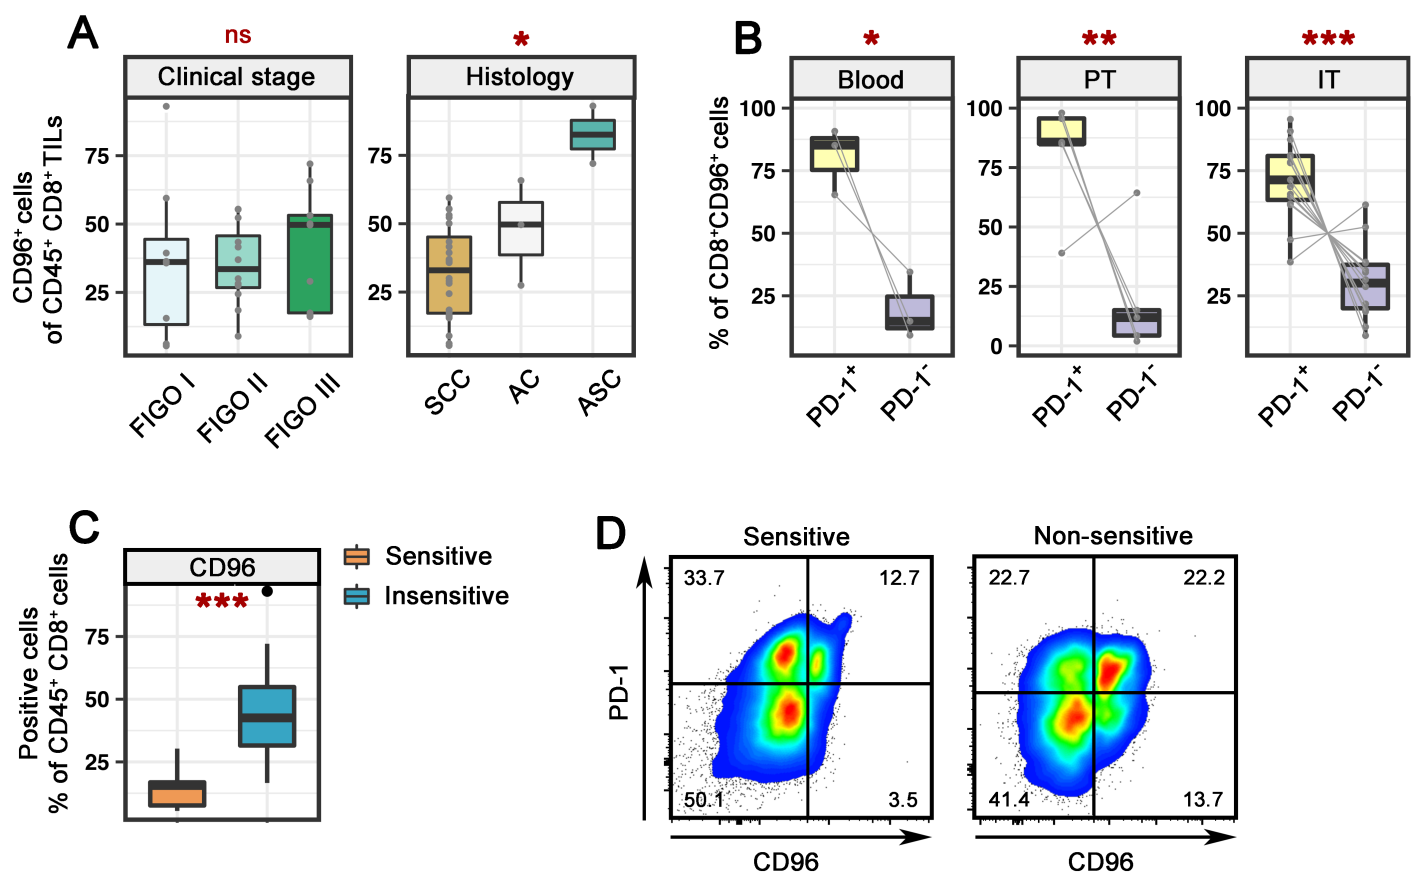

Supplement: jitc-2021-003667supp009.pdf [file jitc-2021-003667supp009.pdf]

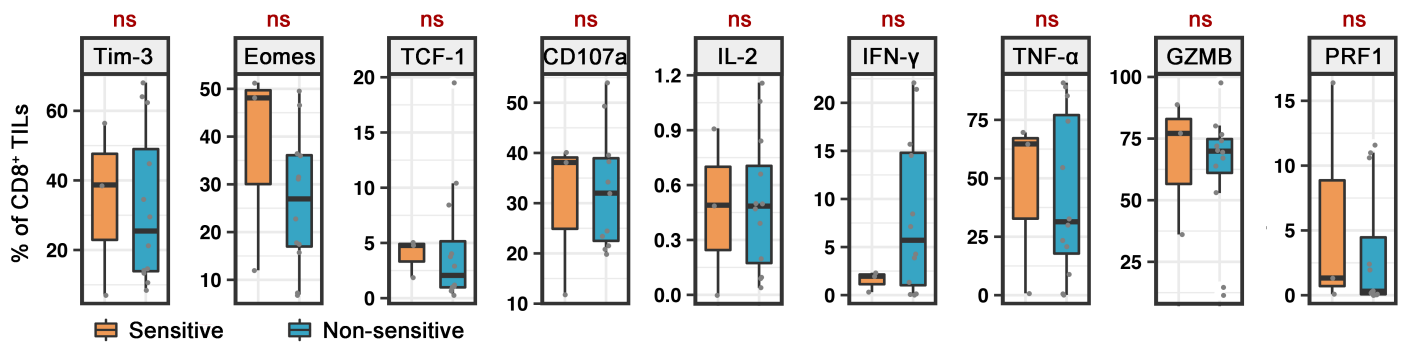

Supplement: jitc-2021-003667supp010.pdf [file jitc-2021-003667supp010.pdf]

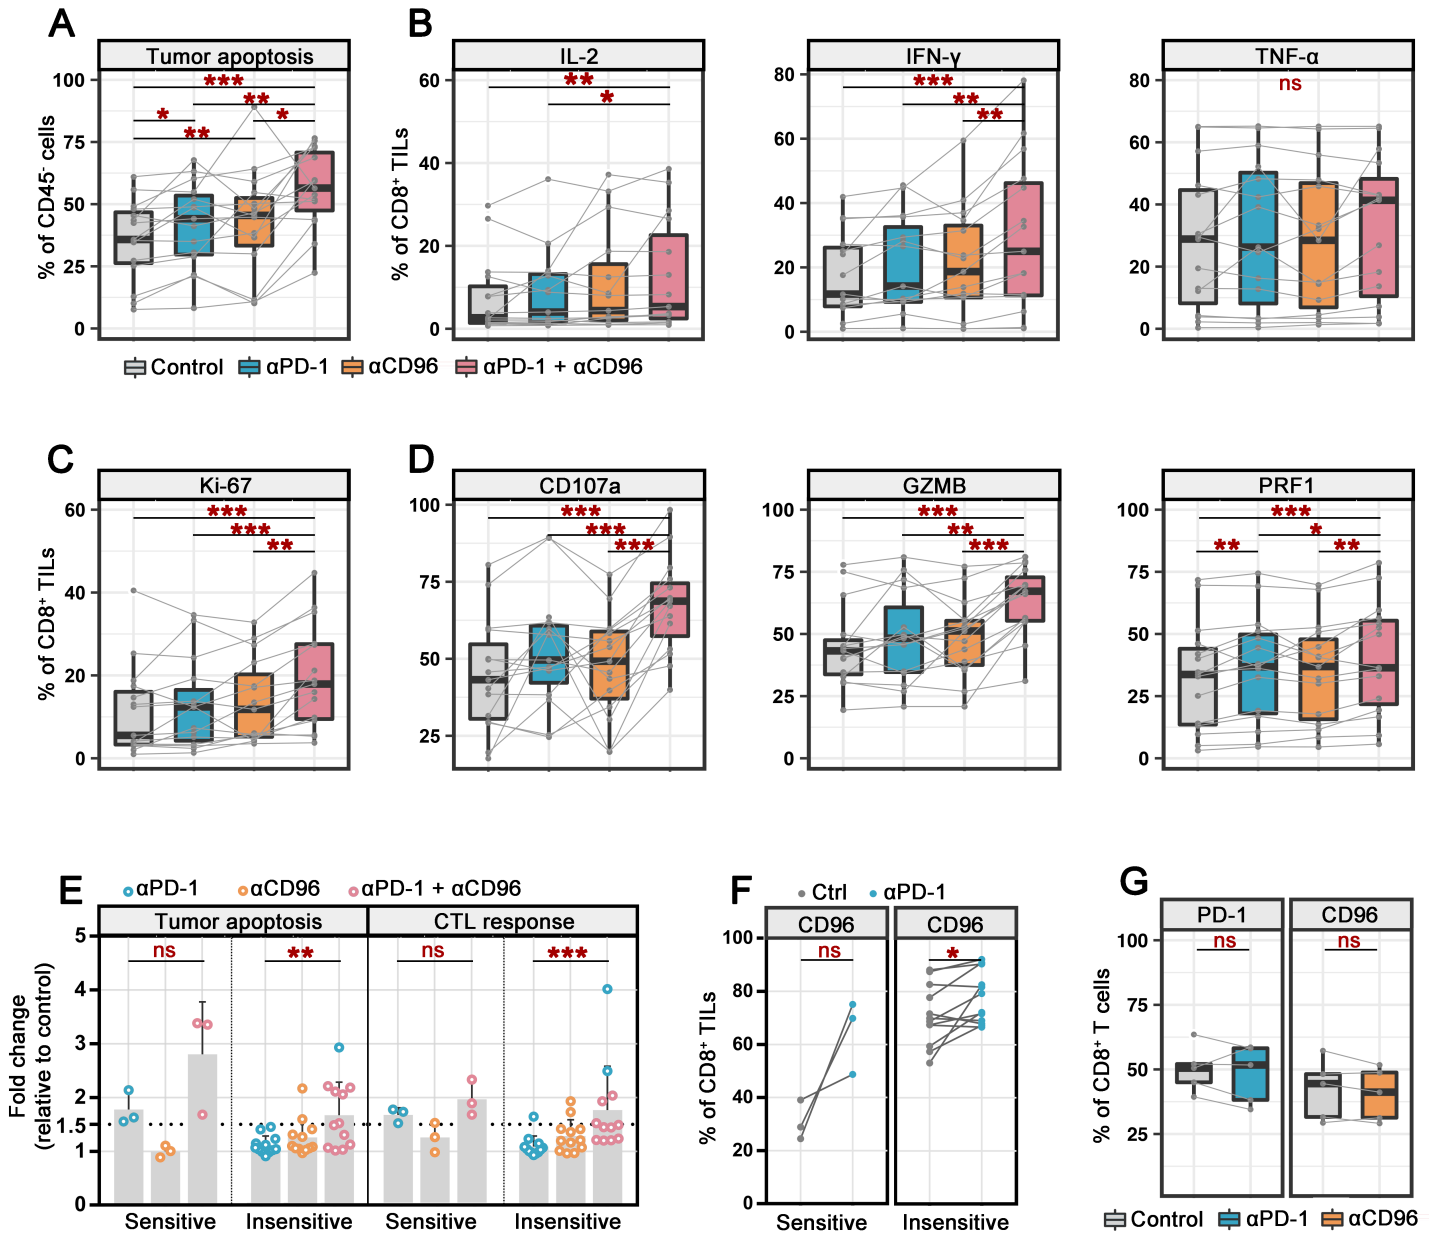

Supplement: jitc-2021-003667supp011.pdf [file jitc-2021-003667supp011.pdf]

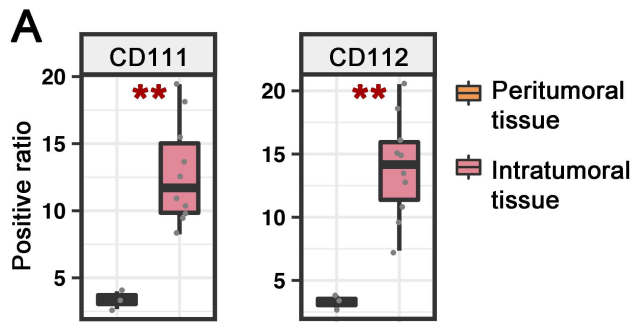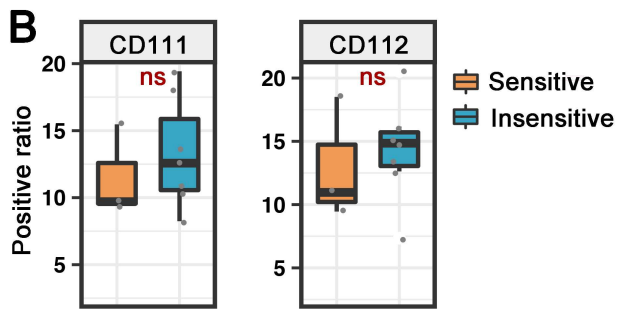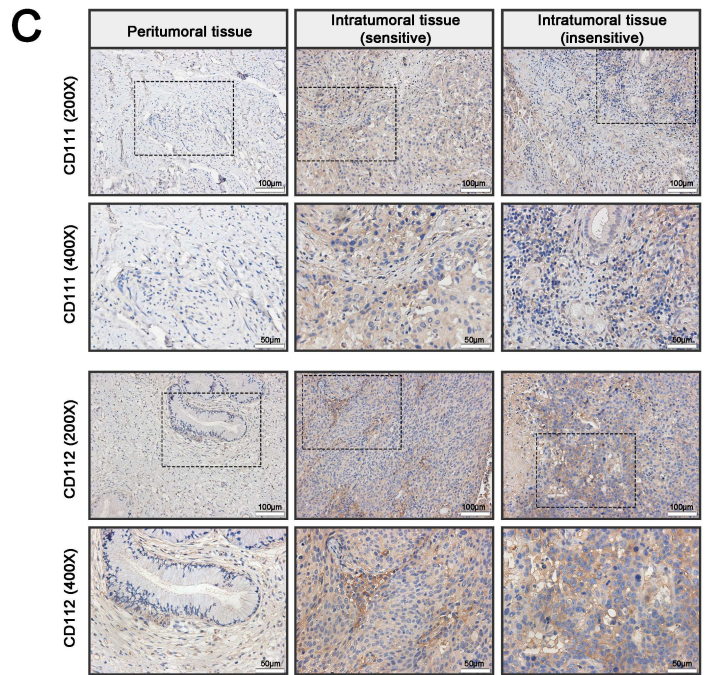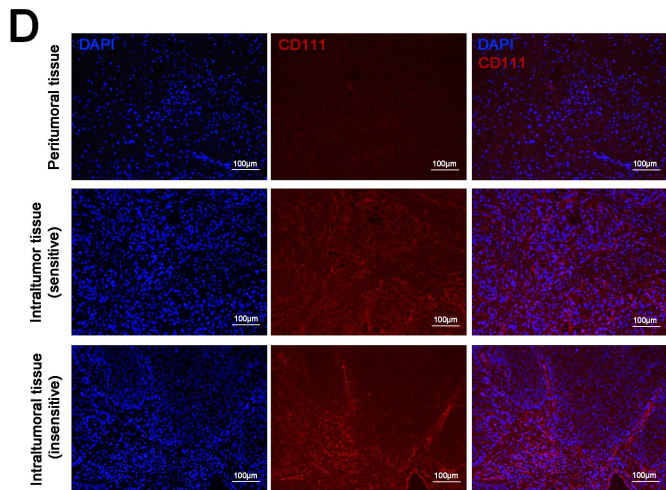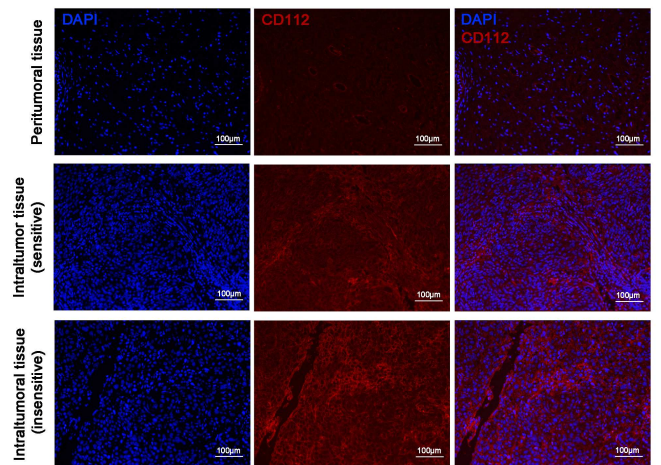

Supplement: jitc-2021-003667supp012.pdf [file jitc-2021-003667supp012.pdf]

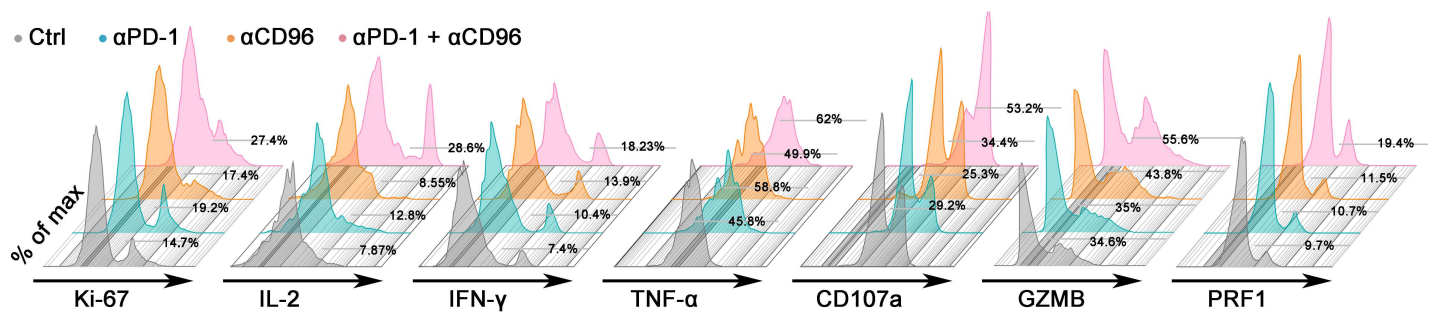

Supplement: jitc-2021-003667supp013.pdf [file jitc-2021-003667supp013.pdf]
